# Supplementary material for: Accelerated design of nickel-cobalt based catalysts for CO2 hydrogenation with human-in-the-loop active machine learning
Source: Royal Society of Chemistry journal article supplement (doi:10.1039/d4cy00873a), 2024-01-01
Supplement: d4cy00873a1.pdf [file d4cy00873a1.pdf]

## **Accelerated Design of Nickel-Cobalt Based Catalysts for CO<sub>2</sub> Hydrogenation with Human-in-the-Loop Active Machine Learning**

Yasemen Kuddusi<sup>1,2,\*</sup>, Maarten R. Dobbelaere<sup>3</sup>, Kevin M. Van Geem<sup>3</sup>, Andreas Züttel<sup>1,2</sup>

<sup>1</sup>Laboratory of Materials for Renewable Energy (LMER), Institute of Chemical Sciences and Engineering (ISIC), Basic Science Faculty (SB), École Polytechnique Fédérale de Lausanne (EPFL) Valais/Wallis, Energypolis, Rue de l'Industrie 17, 1951 Sion, Switzerland

<sup>2</sup>Empa Materials Science & Technology, 8600 Dübendorf, Switzerland

<sup>3</sup>Laboratory for Chemical Technology, Department of Materials, Textiles and Chemical Engineering, Ghent University, Technologiepark 125, 9052 Gent, Belgium

\* Corresponding author: [yasemen.kuddusi@epfl.ch](mailto:yasemen.kuddusi@epfl.ch)

## **SUPPORTING INFORMATION**

## S1. Code Availability

The entire source code is provided as open-source software under MIT license in the following repository: <https://www.github.com/mrodbbe/gandalf-doe>. All conclusions from the paper can be reproduced using the provided scripts. A demo notebook is available in the folder `notebooks/demo.ipynb`.

## S2. Hyperparameter Optimization

The key hyperparameters of each model were optimized via grid search. The optimized hyperparameters are marked in bold.

### S2.1. Extreme Gradient Boosting

Extreme gradient boosting (XGB) models are created with the open-source software XGBoost (version 1.6.2) in python 3.7. The following XGB hyperparameters are optimized via grid search:

- Number of estimators: [500, 1000, 2500, **5000**, 10000]
- Maximum depth: [**2**, 3, 4]
- Learning rate: [0.001, 0.005, 0.01, 0.025, 0.05, 0.1, 0.25, 0.5, **0.75**]
- Subsample: [0.05, 0.1, 0.25, 0.5, 0.6, 0.7, 0.75, **1**]
- Tree method: [**histograms**, exact]

### S2.2. Random Forests

Random forests (RF) regressors are implemented via scikit-learn (version 1.3.2 in python 3.11).

The following RF hyperparameters are optimized via grid search:

- Number of estimators: [**100**, 500, 1000]
- Maximum depth: [None, 2, **5**]

- Maximum features: [**sqrt**, log2]
- Minimal samples per split: [**2**, 5, 10]

### S2.3. Gaussian Processes

Gaussian process regression (GP) is implemented via GPy (version 1.12 in python 3.7). The following GP hyperparameters are optimized via grid search:

- Kernel: [Rational quadratic, exponential, linear, Matérn 3/2, Matérn 5/2, **radial basis function**]

## S3. Gaussian n-dimensional Active Learning Framework (GandALF)

The Gaussian n-dimensional Active Learning Framework (GandALF) was applied in this study and in this section, we repeat the working principle of this algorithm [1].

GandALF is a versatile design-of-experiments tool that can handle continuous, discrete, and categorical variables. It selects the next experiment or set of experiments based on informativeness, representativeness, and diversity. The informativeness criterion imposes that an experiment should be chosen so that it adds information to the model while minimizing the information redundancy. An experiment is representative when it follows the distribution of experiments and is not an outlier. The diversity is guaranteed when experiments are selected that are sufficiently different from each other. Before initiating the experiments, a pool of P unlabeled data points is drawn from the design space. Here, the pool size P is kept at the default size of 100,000. The initial experiments are selected by clustering the pool of potential experiments into  $n_{init}$  (in this work:  $n_{init} = 5$ ) initial experiments using the k-means algorithm [2]. The centroid of every cluster is picked as an initial experiment. The selection of the centroid ensures that the most

representative experiment is chosen, hence ensuring the representativeness of the initial experiments.

A Gaussian process with a radial basis function (RBF) kernel is used as surrogate model. The Gaussian process surrogate model is created a first time using the initial experiments, after which GandALF chooses new experiments. From the second iteration on, a new pool is drawn from the design space with  $P$  equal to  $20,000 \times n$ , with  $n$  the number of previously performed experiments. Then, this pool is divided in  $n + 1$  clusters. The selection process solely considers experiments from the largest  $n_{cluster}$  empty clusters. The original GandALF version was fully sequential and, therefore,  $n_{cluster}$  was equal to 1. In this work,  $n_{cluster}$  is set to 3. We define an empty cluster as a cluster that only contains unlabeled, potential experiments. The choice of the largest clusters ascertains that the representativeness criterion is met. Since these clusters are empty, the diversity criterion is satisfied. Finally, the next  $n_{experiments}$  experiments are drawn from each picked cluster. Again, as GandALF was originally fully sequential,  $n_{experiments}$  was equal to 1, meaning that 1 experiment was drawn from the single largest empty cluster. In this work,  $n_{experiments}$  is set to 3, whereby the constraint is added that the catalyst properties and catalyst treatment are fixed, which restricts the diversity criterion. Thus, a maximum of 9 experiments (i.e.,  $n_{cluster} \times n_{experiments}$ ) can be selected per iteration. The next experiments are selected from the empty clusters using the expected model outcome change (EMOC) acquisition function [3]. The use of the EMOC acquisition function is to ensure that the experiment is informative, as the acquisition function requires an accurate determination of the uncertainty of the outcome for a specific experiment.

## S4. Experimental Details

### S4.1. Experimental Set-up

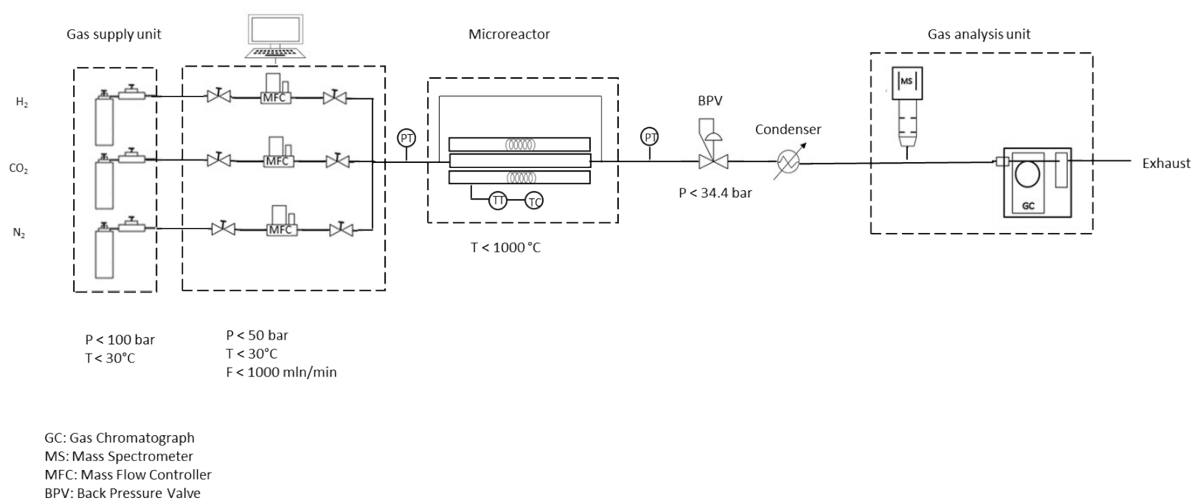

**Figure S3.1. Plan of the experimental setup with gas supply and controlling unit, the microreactor and the gas analysis unit.**

### S4.2. Catalytic Activity Tests

**Table S3.1. Overview of all experiments performed in this work with the experimental variables and output metrics.**

| T<br>[K] | P<br>[bar] | GHSV<br>[ml/h/g] | Ni<br>[%] | Co<br>[%] | T<br>calc<br>[K] | T<br>red<br>[K] | Y<br>CH <sub>4</sub><br>[%] | X<br>CO <sub>2</sub><br>[%] | S<br>CH <sub>4</sub><br>[%] | S<br>CO<br>[%] | STY<br>CH <sub>4</sub><br>[g/h/g <sub>cat</sub> ] |
|----------|------------|------------------|-----------|-----------|------------------|-----------------|-----------------------------|-----------------------------|-----------------------------|----------------|---------------------------------------------------|
| 623      | 5          | 12552            | 14        | 4         | 673              | 823             | 44.19                       | 48.05                       | 91.97                       | 8.03           | 0.79                                              |
| 643      | 5          | 16375            | 10        | 5         | 873              | 823             | 0.00                        | 7.05                        | 0.00                        | 100.00         | 0.00                                              |
| 643      | 5          | 13141            | 15        | 5         | 823              | 673             | 4.03                        | 6.81                        | 59.11                       | 40.89          | 0.08                                              |
| 673      | 1          | 3300             | 15        | 0         | 723              | 773             | 53.92                       | 62.17                       | 86.73                       | 13.27          | 0.25                                              |
| 673      | 1          | 6598             | 15        | 5         | 723              | 773             | 44.47                       | 54.73                       | 81.25                       | 18.75          | 0.42                                              |
| 633      | 9          | 25024            | 14        | 10        | 873              | 673             | 5.00                        | 7.21                        | 69.35                       | 30.65          | 0.18                                              |
| 583      | 7          | 20332            | 14        | 10        | 873              | 673             | 3.95                        | 5.82                        | 67.90                       | 32.10          | 0.12                                              |
| 633      | 7          | 25070            | 21        | 10        | 673              | 623             | 24.49                       | 28.60                       | 85.63                       | 14.37          | 0.88                                              |

|     |    |       |    |    |     |     |       |       |        |        |      |
|-----|----|-------|----|----|-----|-----|-------|-------|--------|--------|------|
| 663 | 9  | 17236 | 21 | 10 | 673 | 623 | 57.34 | 65.58 | 87.44  | 12.56  | 1.42 |
| 603 | 10 | 10968 | 21 | 10 | 673 | 623 | 24.40 | 26.26 | 92.91  | 7.09   | 0.38 |
| 583 | 10 | 14102 | 21 | 10 | 673 | 623 | 10.53 | 11.51 | 91.49  | 8.51   | 0.21 |
| 623 | 1  | 3271  | 6  | 1  | 623 | 673 | 2.00  | 3.65  | 54.67  | 45.33  | 0.01 |
| 583 | 8  | 9474  | 18 | 2  | 823 | 723 | 7.87  | 9.51  | 82.75  | 17.25  | 0.11 |
| 553 | 4  | 11053 | 18 | 2  | 823 | 723 | 0.02  | 1.78  | 1.38   | 98.62  | 0.00 |
| 523 | 4  | 7895  | 18 | 2  | 823 | 723 | 0.00  | 0.00  | 0.00   | 0.00   | 0.00 |
| 613 | 7  | 3158  | 18 | 2  | 823 | 723 | 20.15 | 21.60 | 93.28  | 6.72   | 0.09 |
| 633 | 3  | 9410  | 20 | 9  | 873 | 873 | 28.35 | 31.31 | 90.54  | 9.46   | 0.38 |
| 583 | 1  | 7841  | 20 | 9  | 873 | 873 | 6.31  | 8.45  | 74.64  | 25.36  | 0.07 |
| 653 | 5  | 7841  | 20 | 9  | 873 | 873 | 37.98 | 39.41 | 96.37  | 3.63   | 0.43 |
| 583 | 8  | 16154 | 8  | 2  | 673 | 673 | 0.00  | 0.00  | 0.00   | 0.00   | 0.00 |
| 683 | 4  | 9532  | 14 | 0  | 623 | 673 | 91.15 | 91.15 | 100.00 | 0.00   | 1.24 |
| 713 | 2  | 12692 | 20 | 6  | 723 | 823 | 74.39 | 82.13 | 90.58  | 9.42   | 1.35 |
| 753 | 3  | 11106 | 20 | 6  | 723 | 823 | 81.78 | 85.96 | 95.13  | 4.87   | 1.30 |
| 733 | 7  | 17452 | 20 | 6  | 723 | 823 | 83.61 | 91.95 | 90.92  | 9.08   | 2.09 |
| 593 | 4  | 19412 | 10 | 3  | 823 | 723 | 0.00  | 0.00  | 0.00   | 0.00   | 0.00 |
| 533 | 8  | 24265 | 10 | 3  | 823 | 723 | 0.00  | 0.00  | 0.00   | 0.00   | 0.00 |
| 523 | 1  | 16176 | 10 | 3  | 823 | 723 | 0.00  | 0.00  | 0.00   | 0.00   | 0.00 |
| 583 | 3  | 3283  | 6  | 7  | 873 | 723 | 3.90  | 7.40  | 52.72  | 47.28  | 0.02 |
| 523 | 6  | 9850  | 6  | 7  | 873 | 723 | 2.73  | 7.11  | 38.35  | 61.65  | 0.04 |
| 693 | 2  | 11379 | 13 | 2  | 873 | 823 | 6.60  | 10.54 | 62.58  | 37.42  | 0.11 |
| 753 | 1  | 17882 | 13 | 2  | 873 | 823 | 13.01 | 27.64 | 47.07  | 52.93  | 0.33 |
| 583 | 8  | 6567  | 8  | 3  | 673 | 773 | 17.37 | 18.60 | 93.38  | 6.62   | 0.16 |
| 603 | 5  | 3284  | 8  | 3  | 673 | 773 | 35.57 | 39.59 | 89.85  | 10.15  | 0.17 |
| 693 | 7  | 4737  | 4  | 7  | 873 | 823 | 44.53 | 60.42 | 73.70  | 26.30  | 0.30 |
| 753 | 8  | 11052 | 4  | 7  | 873 | 823 | 35.51 | 60.31 | 58.88  | 41.12  | 0.56 |
| 583 | 3  | 18060 | 20 | 6  | 673 | 723 | 15.60 | 17.48 | 89.22  | 10.78  | 0.40 |
| 543 | 10 | 4925  | 20 | 6  | 673 | 723 | 21.17 | 22.25 | 95.14  | 4.86   | 0.15 |
| 683 | 7  | 21029 | 7  | 2  | 873 | 673 | 2.06  | 11.56 | 17.80  | 82.20  | 0.06 |
| 703 | 5  | 25882 | 7  | 2  | 873 | 673 | 1.46  | 7.03  | 20.76  | 79.24  | 0.05 |
| 713 | 7  | 7895  | 19 | 7  | 823 | 723 | 74.12 | 75.65 | 97.98  | 2.02   | 0.84 |
| 763 | 5  | 15789 | 19 | 7  | 823 | 723 | 56.21 | 68.69 | 81.84  | 18.16  | 1.27 |
| 593 | 4  | 21557 | 5  | 3  | 723 | 623 | 0.00  | 4.45  | 0.00   | 100.00 | 0.00 |
| 523 | 1  | 9950  | 5  | 3  | 723 | 623 | 0.00  | 0.00  | 0.00   | 0.00   | 0.00 |
| 693 | 8  | 6600  | 7  | 8  | 723 | 773 | 61.06 | 71.10 | 85.89  | 14.11  | 0.58 |
| 763 | 10 | 4950  | 7  | 8  | 723 | 773 | 91.53 | 91.53 | 100.00 | 0.00   | 0.65 |

|     |    |       |    |    |     |     |       |       |        |        |      |
|-----|----|-------|----|----|-----|-----|-------|-------|--------|--------|------|
| 733 | 10 | 6600  | 25 | 0  | 623 | 873 | 96.08 | 96.08 | 100.00 | 0.00   | 0.91 |
| 763 | 1  | 6600  | 0  | 10 | 623 | 923 | 31.91 | 55.21 | 57.79  | 42.21  | 0.30 |
| 763 | 9  | 8250  | 0  | 0  | 623 | 873 | 0.00  | 11.30 | 0.00   | 100.00 | 0.00 |
| 753 | 4  | 3300  | 25 | 1  | 623 | 823 | 91.10 | 91.10 | 100.00 | 0.00   | 0.43 |
| 643 | 4  | 23100 | 11 | 3  | 723 | 673 | 4.56  | 7.98  | 57.08  | 42.92  | 0.15 |
| 693 | 7  | 16500 | 19 | 6  | 873 | 823 | 71.08 | 71.08 | 100.00 | 0.00   | 1.68 |
| 743 | 5  | 14850 | 8  | 6  | 773 | 923 | 68.48 | 78.71 | 87.00  | 13.00  | 1.46 |
| 563 | 10 | 8250  | 22 | 7  | 673 | 723 | 14.07 | 14.07 | 100.00 | 0.00   | 0.17 |
| 753 | 1  | 16500 | 16 | 2  | 823 | 823 | 36.06 | 58.40 | 61.75  | 38.25  | 0.85 |
| 643 | 7  | 18150 | 17 | 0  | 723 | 723 | 68.31 | 68.31 | 100.00 | 0.00   | 1.78 |
| 563 | 3  | 8250  | 0  | 9  | 873 | 823 | 2.20  | 3.71  | 59.27  | 40.73  | 0.03 |
| 683 | 5  | 16500 | 23 | 4  | 873 | 923 | 84.73 | 84.73 | 100.00 | 0.00   | 2.00 |
| 613 | 6  | 11550 | 2  | 7  | 673 | 723 | 1.28  | 7.60  | 16.79  | 83.21  | 0.02 |
| 733 | 10 | 23100 | 21 | 3  | 673 | 873 | 93.28 | 93.28 | 100.00 | 0.00   | 3.09 |
| 733 | 10 | 3300  | 20 | 0  | 623 | 873 | 95.36 | 95.36 | 100.00 | 0.00   | 0.45 |

### S4.3. TGA Curves

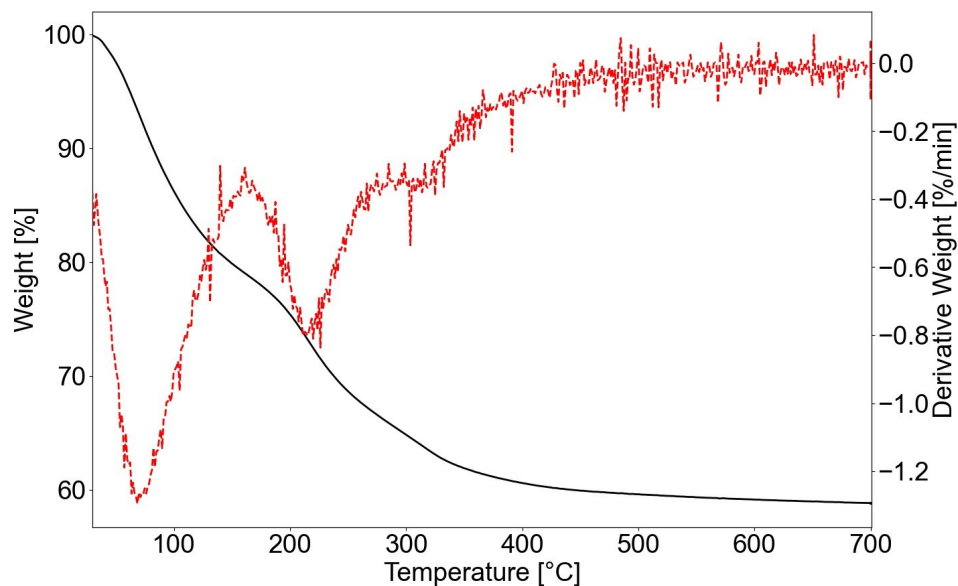

**Figure S3.2. Thermogravimetric analysis (TGA) of 15Ni-5Co/Al<sub>2</sub>O<sub>3</sub> under air flow heating up to 700°C with a heating rate of 5°C/min. Residual mass curve is represented by the black line and**

differential residual mass curve is represented by the red line.

**Table S3.2. Mass residuals and changes retrieved from TGA of 15Ni-5Co/Al<sub>2</sub>O<sub>3</sub> under air flow heating up to 700°C with a heating rate of 5°C/min.**

| <b>Temperature (°C)</b> | <b>Mass change from 30 °C (%)</b> | <b>Residual mass from 30 °C (%)</b> |
|-------------------------|-----------------------------------|-------------------------------------|
| 350                     | 38.70                             | 61.90                               |
| 400                     | 39.37                             | 60.61                               |
| 450                     | 40.05                             | 59.93                               |
| 500                     | 40.36                             | 59.62                               |
| 550                     | 40.63                             | 59.35                               |
| 600                     | 40.83                             | 59.16                               |
| 650                     | 40.99                             | 58.98                               |
| 700                     | 41.13                             | 58.85                               |



## S4.4. XPS Spectra

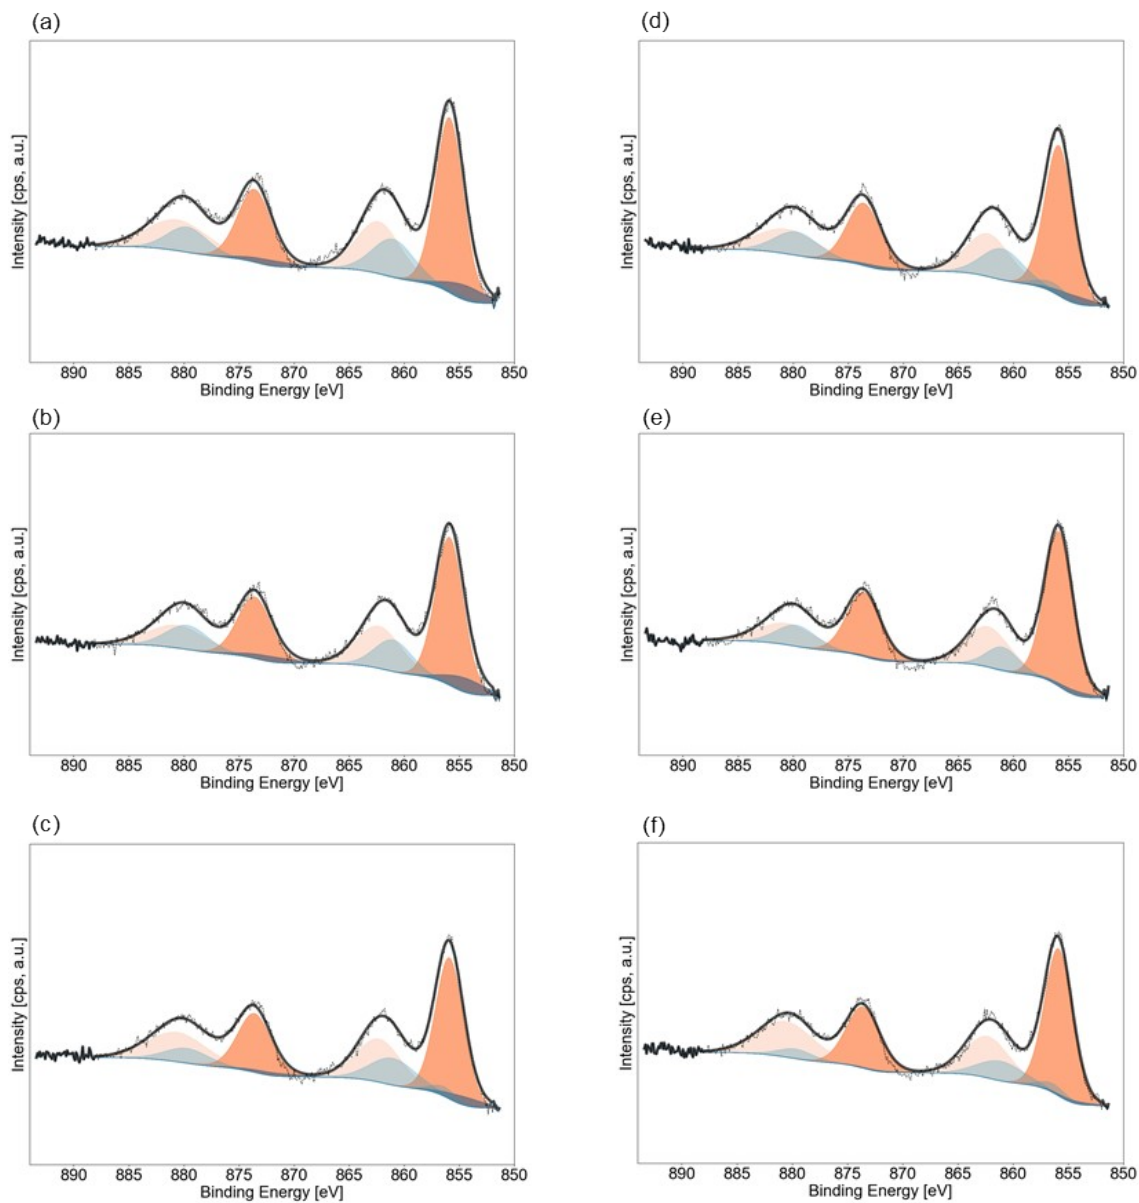

**Figure S3.3. Ni 2p XPS spectra of (a) c623 (b) c673 (c) c723 (d) c773 (e) c823 (f) c873. Orange species represent  $\text{NiAl}_2\text{O}_4$  and blue species represent  $\text{NiO}$ .**

**Table S3.3. ESCA parameters of Ni 2p lines. XPS fitting details for NiO and NiAl<sub>2</sub>O<sub>4</sub> for main and satellite peaks. These parameters were retrieved from [4].**

|                                  | Ni 2p <sub>3/2</sub> |      |                |                | Ni 2p <sub>1/2</sub> |      |                |                |
|----------------------------------|----------------------|------|----------------|----------------|----------------------|------|----------------|----------------|
|                                  | Main peak            |      | Satellite 1    | Satellite 2    | Main peak            |      | Satellite 1    | Satellite 2    |
|                                  | E <sub>b</sub>       | FWHM | E <sub>b</sub> | E <sub>b</sub> | E <sub>b</sub>       | FWHM | E <sub>b</sub> | E <sub>b</sub> |
| NiO                              | 854.5                | 4.1  | 856.4          | 861.0          | 872.3                | 5.4  | 874.2          | 879.7          |
| NiAl <sub>2</sub> O <sub>4</sub> | 856.0                | 2.8  | 858.1          | 862.3          | 873.6                | 3.6  | 875.7          | 880.6          |

**Table S3.4. NiO percentages throughout the samples that are calcined at different temperatures.**

| Sample Coding | NiO / (NiO+NiAl <sub>2</sub> O <sub>4</sub> )<br>at Ni 2p <sub>3/2</sub> (%) | NiO / (NiO+NiAl <sub>2</sub> O <sub>4</sub> )<br>at Ni 2p <sub>1/2</sub> (%) |
|---------------|------------------------------------------------------------------------------|------------------------------------------------------------------------------|
| c623          | 10.52                                                                        | 10.51                                                                        |
| c673          | 11.77                                                                        | 11.78                                                                        |
| c723          | 7.715                                                                        | 7.715                                                                        |
| c773          | 6.590                                                                        | 6.590                                                                        |
| c823          | 3.857                                                                        | 3.857                                                                        |
| c873          | 2.458                                                                        | 2.458                                                                        |

## S4.5. Textural Properties

**Table S3.5. BET/BJH analysis results. Surface area, average pore volume and average pore size for 15Ni-5Co/Al<sub>2</sub>O<sub>3</sub> samples that are calcined at various temperatures.**

| Sample Coding | BET surface area (m <sup>2</sup> g <sup>-1</sup> ) | BJH pore volume (cm <sup>3</sup> g <sup>-1</sup> ) | BJH pore diameter (nm) |
|---------------|----------------------------------------------------|----------------------------------------------------|------------------------|
| c623          | 193.69                                             | 0.4950                                             | 9.7454                 |
| c673          | 199.08                                             | 0.5347                                             | 10.263                 |
| c723          | 197.89                                             | 0.5546                                             | 10.649                 |
| c773          | 192.35                                             | 0.5570                                             | 11.102                 |
| c823          | 193.50                                             | 0.5434                                             | 10.625                 |
| c873          | 192.79                                             | 0.5570                                             | 10.915                 |

## S5. Mahalanobis Distance Criterion

The Mahalanobis distance ( $d_M$ ) measures the distance between a distribution of data points and a single data point. In this case, the distance is measured between a set of experimental variables and the training set. It is calculated via eq (S1).

$$d_M^2 = z^T \Lambda^{-1} z \quad (\text{S1})$$

In eq (S1),  $z$  is a column vector containing the seven experimental variables and  $\Lambda'$  is the  $7 \times 7$  covariance matrix of the experimental variables in the dataset.

## S6. SHAP Values

The importance of a feature in a model can be visualized using summary plots. These plots sort the features vertically by importance. In each row, the SHAP value per data point is given. The color of this dot indicates the value of the feature. For example, a red dot in the temperature row indicates a set of experimental variables that includes a high temperature value. Figures S5.1 to S5.3 show the summary plots that are created for XGB models trained on CO<sub>2</sub> conversion, CH<sub>4</sub> selectivity, and CH<sub>4</sub> space-time yield. These summary plots were created using a single model of which the hyperparameters were optimized with stratified k-fold cross-validation. The training sets were the same of the interpolative model (48 data points collected via active learning).

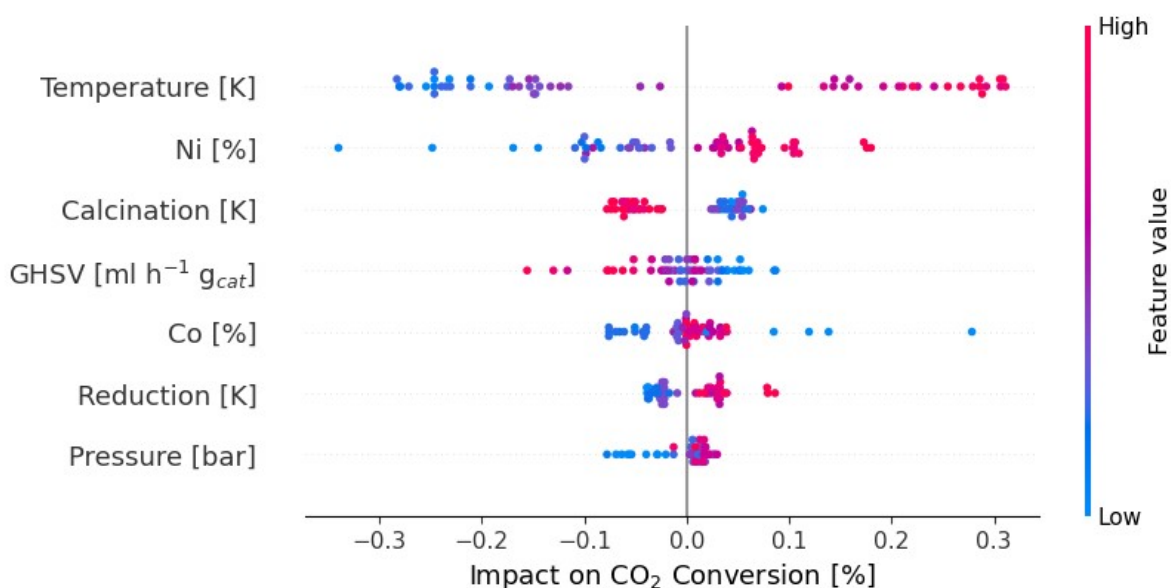

Figure S5.1. Summary plot between experimental variable and the impact on the CO<sub>2</sub> conversion.

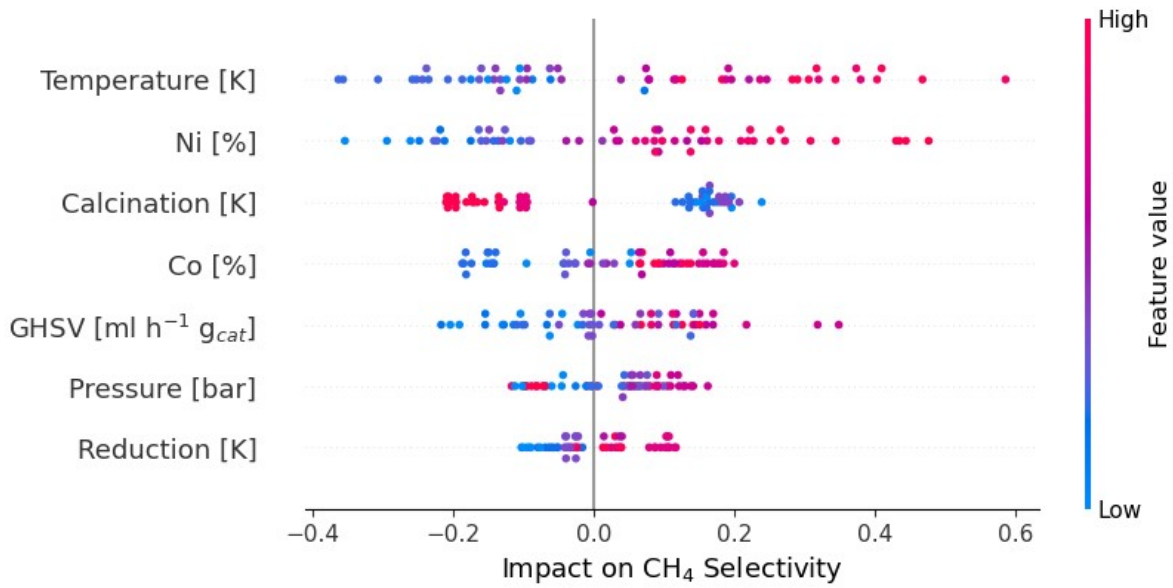

Figure S5.2. Summary plot between experimental variable and the impact on the CH<sub>4</sub> selectivity.

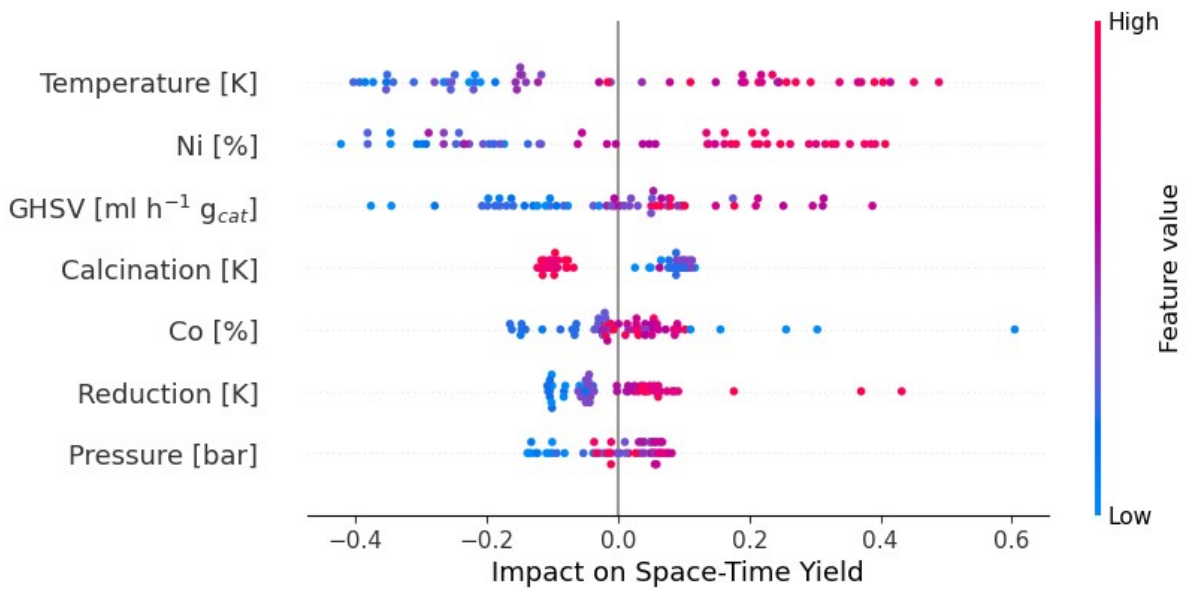

Figure S5.3. Summary plot between experimental variable and the impact on the CH<sub>4</sub> space-time yield.

## S7. Validation by Kinetic Modeling

A microkinetic model is directly interpretable and it provides a relationship between the catalyst structure and its performance. A trade-off lies in the prediction of kinetic parameters. To this extent, we make use of the CO<sub>2</sub> methanation modeling assumptions set by Mutschler *et al.* [5]. Here, we create a model to validate the obtained results.

The rate law that was derived in the work of Mutschler *et al.* [5] was used to calculate the activation energy and Arrhenius parameters. Below is a short overview of the equations required to derive the activation energy.

The rate is defined as the change in partial pressure of CO<sub>2</sub>, as shown in equation (S2).

$$-\frac{dp_{CO_2}}{dt} = r(t) \quad (S2)$$

We derive the rate law for the kinetically limited zone, in which we assume that the backward reaction is close to zero. We define the rate law in equation (S3), in which  $k_+$  is the forward rate coefficient,  $p_{CO_2}$  is the partial pressure of CO<sub>2</sub>,  $p_{H_2}$  is the partial pressure of H<sub>2</sub>, and  $\alpha$  and  $\beta$  are the reaction order with respect to CO<sub>2</sub> and H<sub>2</sub>.

$$r(t) = k_+ p_{CO_2}^\alpha p_{H_2}^\beta \quad (S3)$$

The Arrhenius equation (equation (S4)) relates  $k_+$  with the pre-exponential factor A, the activation energy  $E_A$ , the ideal gas constant R, the temperature T.

$$k_+ = A \exp\left(-\frac{E_A}{RT}\right) \quad (S4)$$

Mutschler *et al.* [5] further assume that because of the stoichiometry of the reaction and the corresponding change in partial pressure (equation (S5)), the reaction orders of CO<sub>2</sub> and H<sub>2</sub> are linked.

$$\Delta P_{CO_2} = \frac{\Delta P_{H_2}}{4} \quad (S5)$$

With the relationship between the partial pressures, the reaction rate can be rewritten as given in equation (S6).

$$r(t) = k_+ p_{CO_2}^\alpha (4p_{CO_2})^{4\alpha} = k'_+ p_{CO_2}^{5\alpha} \quad (S6)$$

To determine the reaction order, the reaction rate is rewritten as a function of the space velocity (SV) and the conversion of CO<sub>2</sub> molecules (X<sub>CO<sub>2</sub></sub>) (equation (S7)).

$$r(t) = SV \cdot (1 - X_{CO_2}) = k''_+ p_{CO_2}^\alpha \quad (S7)$$

The natural logarithm of equation (S7) allows to derive the reaction order  $\alpha$ , as shown in equation (S8).

$$\ln(1 - X_{CO_2}) + \ln SV = \alpha \cdot \ln p_{CO_2} + \ln k''_+ \quad (S8)$$

To obtain the Arrhenius parameters, equation (S6) is rearranged to equation (S9) and integrated from the inlet partial pressure  $p_{CO_2}^i$  to the outlet partial pressure  $p_{CO_2}^o$  and from 0 to the residence time  $t_0$ .

$$\int_{p_{CO_2}^i}^{p_{CO_2}^o} \frac{dp_{CO_2}}{p_{CO_2}^{5\alpha}} = \int_0^{t_0} k'_+ dt \quad (S9)$$

The expression for the modified forward rate constant  $k'_+$  is then obtained in equation (S10).

$$\frac{(1 - X_{CO_2})^{1-5\alpha}}{1-5\alpha} = -k'_+ t_0 + C \quad (S10)$$

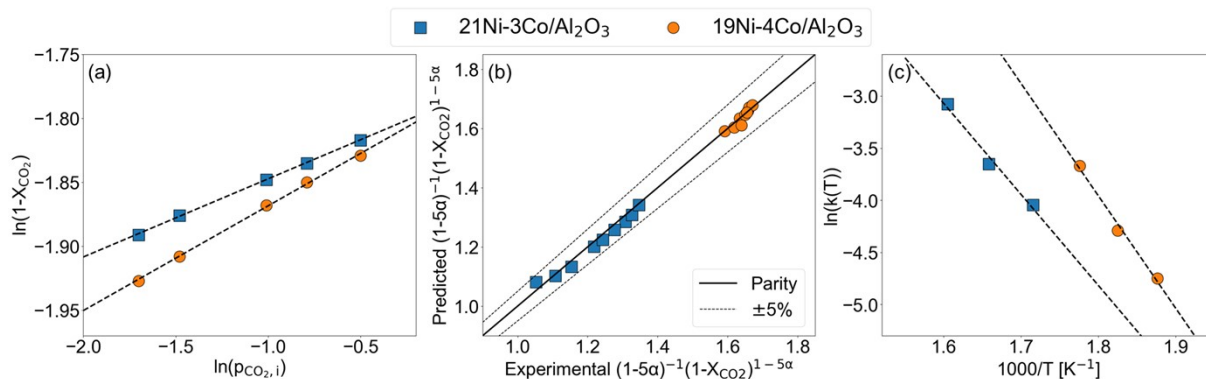

**Figure S6.4. Experiments to derive the kinetic parameters of 19Ni-4Co/Al<sub>2</sub>O<sub>3</sub> catalyst, calcinated at 723 K, reduced at 873 K (orange) and 21Ni-3Co/Al<sub>2</sub>O<sub>3</sub> catalyst, calcinated at 673 K, reduced at 823 K (blue). (a) Linear regression to determine the reaction order. (b) Parity plot for the prediction of the integrated rate law values with Gaussian processes. (c) Linear regression of experimental rate constants with respect to temperature to determine the activation energy.**

A first requirement is the experimental determination of the reaction order  $\alpha$  which was given in equation (S8). This parameter cannot be estimated since the H<sub>2</sub>/CO<sub>2</sub> ratio is kept constant in the design space. The reaction order for CO<sub>2</sub> is determined from the slope of the linear fits in **Figure S6.4. a** and found to be 0.08 for the 19Ni-4Co/Al<sub>2</sub>O<sub>3</sub> and 0.06 for the 21Ni-3Co/Al<sub>2</sub>O<sub>3</sub>. In the modeling approach used here, which assumes a fractional rate law, the next step consists of deriving the Arrhenius parameters. This is done by varying the residence time at different temperatures. The rate coefficient is in this rate-law model determined by plotting the integrated rate law versus the residence time. The y-axis values are predicted using the model trained on the CO<sub>2</sub> conversion,  $X_{CO_2}$ . To ensure the interpolative regime and ascertain accuracy, one measurement is added to the training set at each different GHSV. It is seen in **Figure S6.4. b** that high accuracy ( $R^2 > 0.98$ ) is achieved and the agreement between model and experimental data is in all cases within the 5% error bars. Nevertheless, to determine the Arrhenius parameters, a linear trend has to be obtained and despite the low absolute error, the model is too noisy extract these Arrhenius parameters. Experimentally, the activation energies are obtained with a highly linear trend, as shown in **Figure S6.4. c**. It was found that the 19Ni-4Co/Al<sub>2</sub>O<sub>3</sub> sample has an activation energy of approximately 89 kJ/mol, while the 21Ni-3Co/Al<sub>2</sub>O<sub>3</sub> sample has a lower activation energy of 73



kJ/mol. These values are in the order of magnitude of the activation energies that are found for similar catalytic systems, ranging between 70 and 100 kJ/mol [6], [7], [8], [9].

## S8. Light-Off Curve

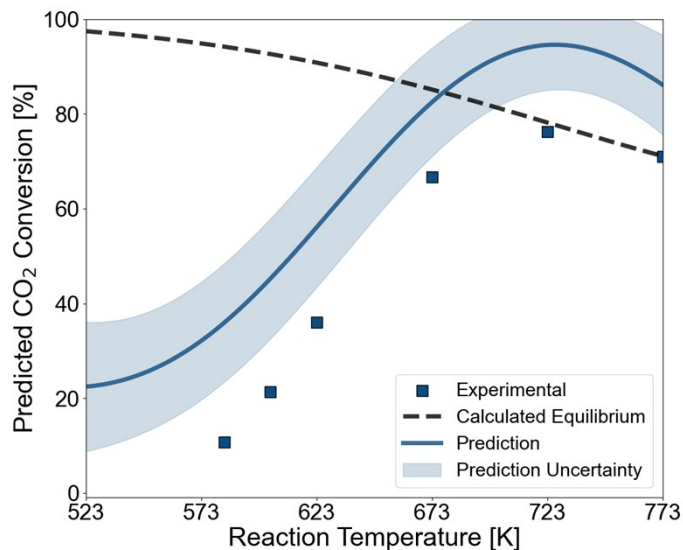

**Figure S7.1. Prior light-off curve prediction without knowledge about the catalytic system for a 21Ni-3Co/Al<sub>2</sub>O<sub>3</sub> catalyst, calcinated at 673 K, reduced at 873 K.**

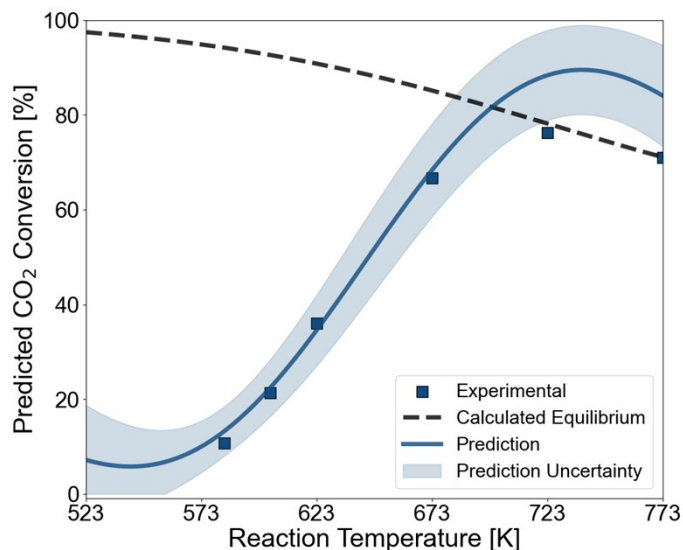

**Figure S7.2. Predicted light-off curve after performing one experiment with the 21Ni-3Co/Al<sub>2</sub>O<sub>3</sub> catalyst, calcinated at 673 K, reduced at 873 K.**

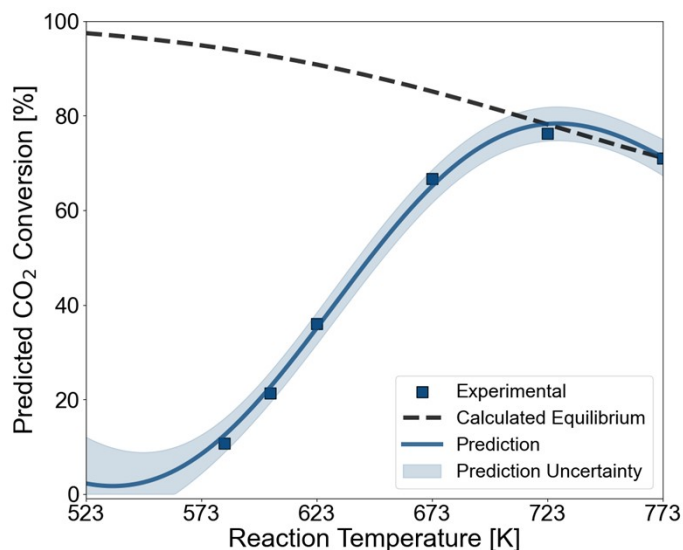

**Figure S7.3. Posterior light-off curve prediction for the 21Ni-3Co/Al<sub>2</sub>O<sub>3</sub> catalyst, calcinated at 673 K, reduced at 873 K after performing activity tests.**

## S9. References

- [1] Y. Ureel *et al.*, “Active learning-based exploration of the catalytic pyrolysis of plastic waste,” *Fuel*, vol. 328, p. 125340, Nov. 2022, doi: 10.1016/j.fuel.2022.125340.
- [2] J. A. Hartigan and M. A. Wong, “Algorithm AS 136: A K-Means Clustering Algorithm,” *Journal of the Royal Statistical Society. Series C (Applied Statistics)*, vol. 28, no. 1, pp. 100–108, 1979, doi: 10.2307/2346830.
- [3] A. Freytag, E. Rodner, and J. Denzler, “Selecting Influential Examples: Active Learning with Expected Model Output Changes,” in *Computer Vision – ECCV 2014*, D. Fleet, T. Pajdla, B. Schiele, and T. Tuytelaars, Eds., Cham: Springer International Publishing, 2014, pp. 562–577.
- [4] C. P. Li, A. Proctor, and D. M. Hercules, “Curve Fitting Analysis of ESCA Ni 2p Spectra of Nickel-Oxygen Compounds and Ni/Al<sub>2</sub>O<sub>3</sub> Catalysts,” *Appl. Spectrosc.*, vol. 38, no. 6, pp. 880–886, Nov. 1984.
- [5] R. Mutschler, E. Moioli, and A. Züttel, “Modelling the CO<sub>2</sub> hydrogenation reaction over Co, Ni and Ru/Al<sub>2</sub>O<sub>3</sub>,” *Journal of Catalysis*, vol. 375, pp. 193–201, Jul. 2019, doi: 10.1016/j.jcat.2019.05.023.
- [6] A. Quindimil *et al.*, “Intrinsic kinetics of CO<sub>2</sub> methanation on low-loaded Ni/Al<sub>2</sub>O<sub>3</sub> catalyst: Mechanism, model discrimination and parameter estimation,” *Journal of CO<sub>2</sub> Utilization*, vol. 57, p. 101888, Mar. 2022, doi: 10.1016/j.jcou.2022.101888.
- [7] T. A. Le, J. Kim, J. K. Kang, and E. D. Park, “CO and CO<sub>2</sub> methanation over Ni/Al@Al<sub>2</sub>O<sub>3</sub> core-shell catalyst,” *Catalysis Today*, vol. 356, pp. 622–630, Oct. 2020, doi: 10.1016/j.cattod.2019.09.028.
- [8] G. Garbarino *et al.*, “A study of Ni/La-Al<sub>2</sub>O<sub>3</sub> catalysts: A competitive system for CO<sub>2</sub> methanation,” *Applied Catalysis B: Environmental*, vol. 248, pp. 286–297, Jul. 2019, doi: 10.1016/j.apcatb.2018.12.063.
- [9] G. Garbarino, D. Bellotti, P. Riani, L. Magistri, and G. Busca, “Methanation of carbon dioxide on Ru/Al<sub>2</sub>O<sub>3</sub> and Ni/Al<sub>2</sub>O<sub>3</sub> catalysts at atmospheric pressure: Catalysts activation, behaviour

and stability,” *International Journal of Hydrogen Energy*, vol. 40, no. 30, pp. 9171–9182, Aug. 2015, doi: 10.1016/j.ijhydene.2015.05.059.
